# Supplementary material for: Magnetically recoverable Ni/C catalysts with hierarchical structure and high-stability for selective hydrogenation of nitroarenes
Source: Royal Society of Chemistry journal article supplement (doi:10.1039/c4cp03978e), 2014-11-10
Supplement: c4cp03978e1.pdf [file c4cp03978e1.pdf]

***Electronic Supplementary Information***

**Magnetically Recoverable Ni/C Catalysts with Hierarchical Structure and High-Stability for Selective Hydrogenation of Nitroarenes**

Peng Zhang<sup>1</sup>, Chang Yu<sup>1</sup>, Xiaoming Fan<sup>1</sup>, Xiuna Wang<sup>1</sup>, Zheng Ling<sup>1</sup>, Zonghua Wang<sup>2</sup>, and Jieshan Qiu<sup>1\*</sup>

<sup>1</sup>Carbon Research Laboratory, Liaoning Key Lab for Energy Materials and Chemical Engineering, State Key Lab of Fine Chemicals, School of Chemical Engineering, Dalian University of Technology, Dalian 116024, China.

<sup>2</sup>Department of Chemistry, Qingdao University, Qingdao 266071, Shandong, China.

\*Corresponding Author. Tel: +86-411-84986024; E-mail: [jqiu@dlut.edu.cn](mailto:jqiu@dlut.edu.cn)

**Table S1.** Catalytic performance of Ni/C catalysts for selective hydrogenation of *o*-CNB

| Catalyst | Conversion (%) | Selectivity (%) |
|----------|----------------|-----------------|
| Ni/C-p   | 6.5            | 100             |
| Ni/C-200 | 19.6           | 94.8            |
| Ni/C-300 | 88.4           | 90.4            |
| Ni/C-400 | 54.6           | 92.8            |
| Ni/C-500 | 41.1           | 95.0            |
| Ni/C-600 | 17.0           | 95.2            |
| Ni/C-700 | 8.0            | 100             |

Reaction conditions: 0.50 g *o*-CNB, 0.05 g catalyst, 50 mL ethanol, 140 °C, 2 MPa H<sub>2</sub>, time 1 h.

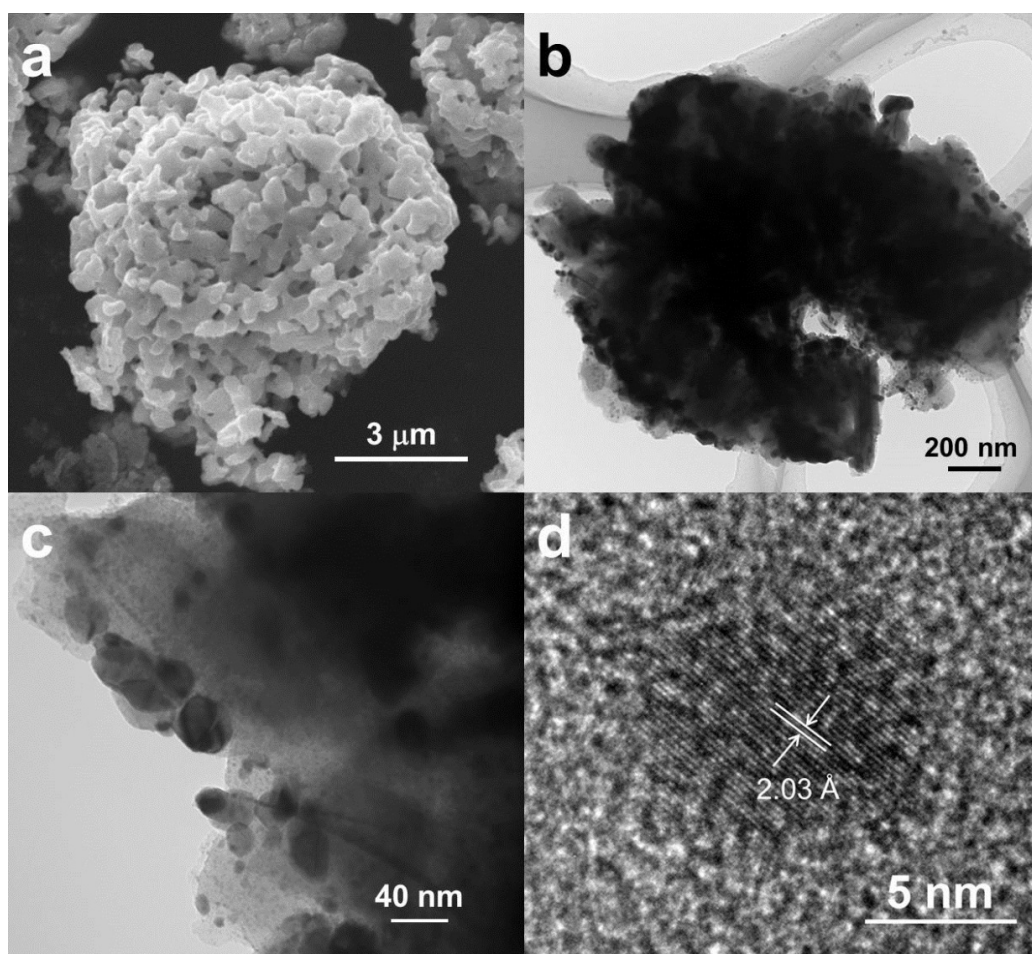

**Figure S1.** (a) SEM image, (b) typical TEM image, and (c) magnified TEM image of the Ni/C-400 catalyst, (d) HRTEM image of one typical Ni particle in the Ni/C-400 catalyst.

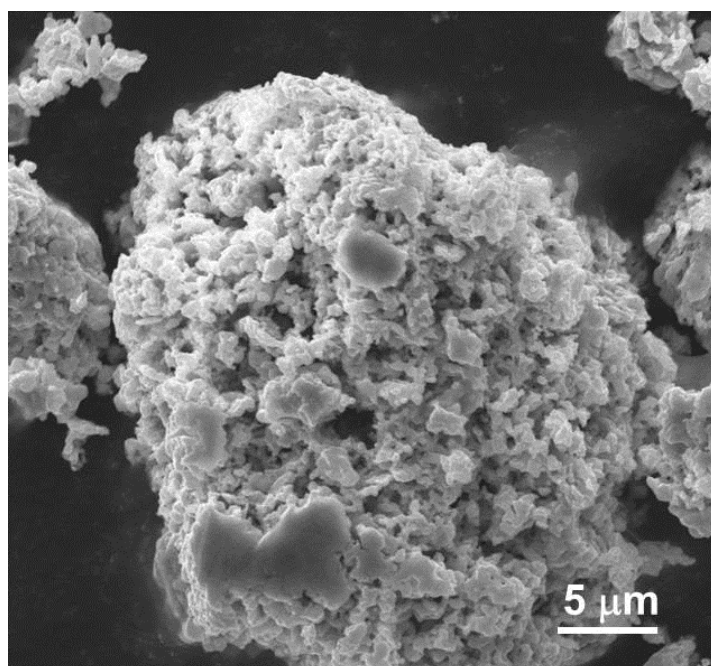

**Figure S2.** SEM image of the Ni/C-500 catalyst.

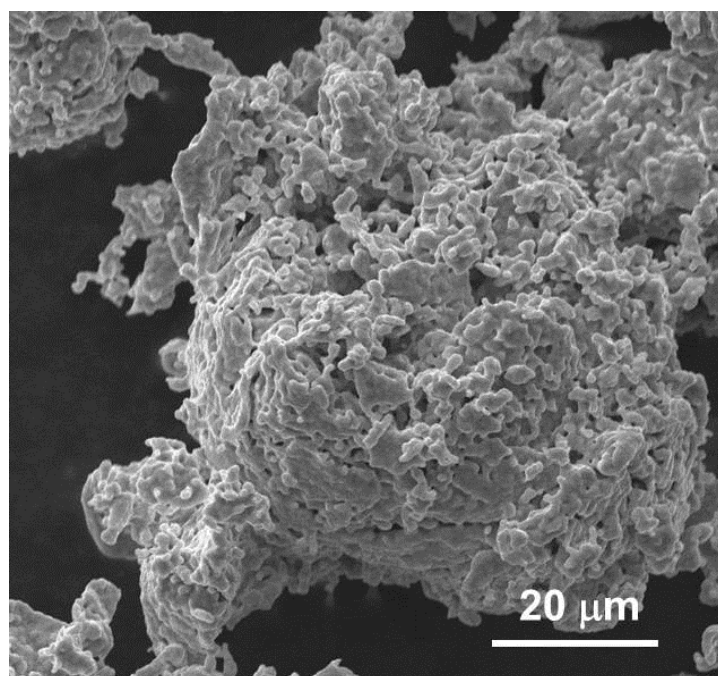

**Figure S3.** SEM image of the Ni/C-600 catalyst.

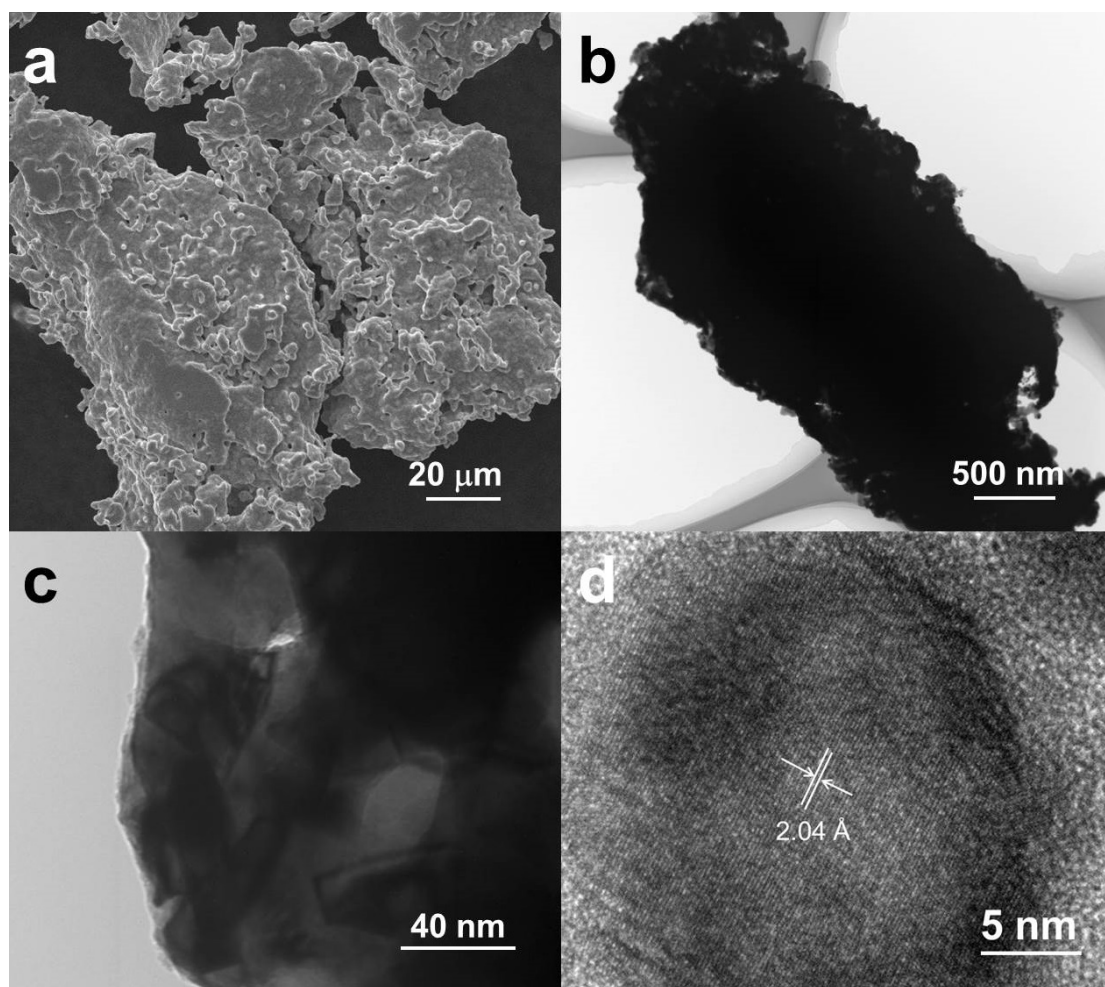

**Figure S4.** (a) SEM image, (b) typical TEM image, and (c) magnified TEM image of the Ni/C-700 catalyst, (d) HRTEM image of one typical Ni particle in the Ni/C-700 catalyst.

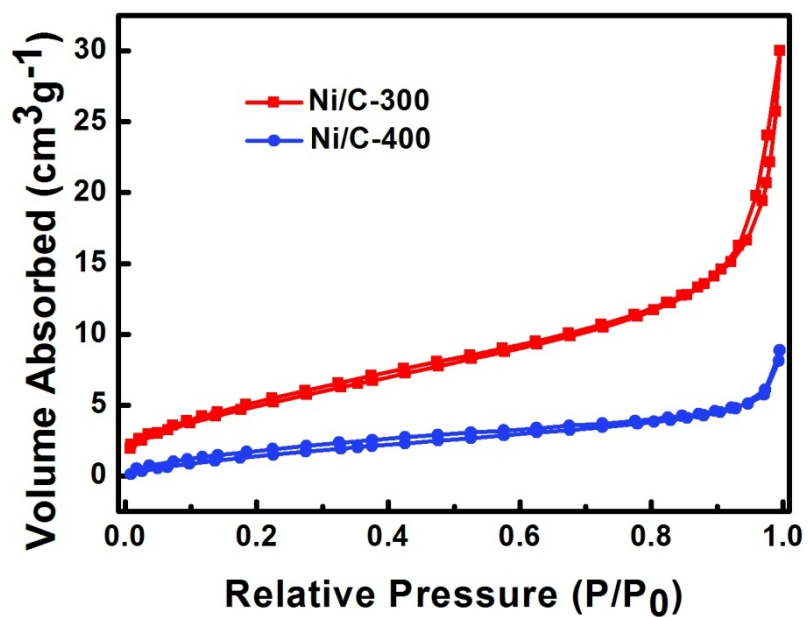

**Figure S5.** Nitrogen adsorption-desorption isotherms of the Ni/C-300 and Ni/C-400 catalysts.

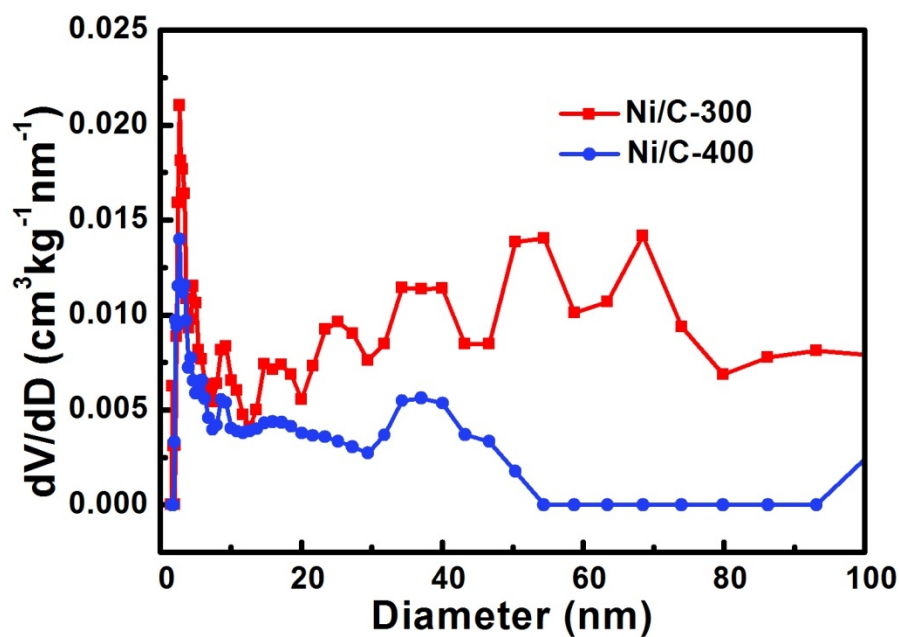

**Figure S6.** The pore size distribution of the Ni/C-300 and Ni/C-400 catalyst.

**Table S2.** Cycling performance of the Ni/C-300 catalyst for selective hydrogenation of *o*-CNB

| Cycle times | Conversion (%) | Selectivity (%) |
|-------------|----------------|-----------------|
| 1           | 98.9           | 86.0            |
| 2           | 96.8           | 93.8            |
| 3           | 91.4           | 97.5            |
| 4           | 94.0           | 92.5            |
| 5           | 96.5           | 95.2            |
| 6           | 94.4           | 92.7            |
| 7           | 91.0           | 92.6            |
| 8           | 92.4           | 92.9            |
| 9           | 92.2           | 93.1            |
| 10          | 93.6           | 93.2            |

Reaction conditions: 0.50 g *o*-CNB, 0.05 g Ni/C-300, 50 mL ethanol, 140 °C, 2.0 MPa H<sub>2</sub>, time 2 h.

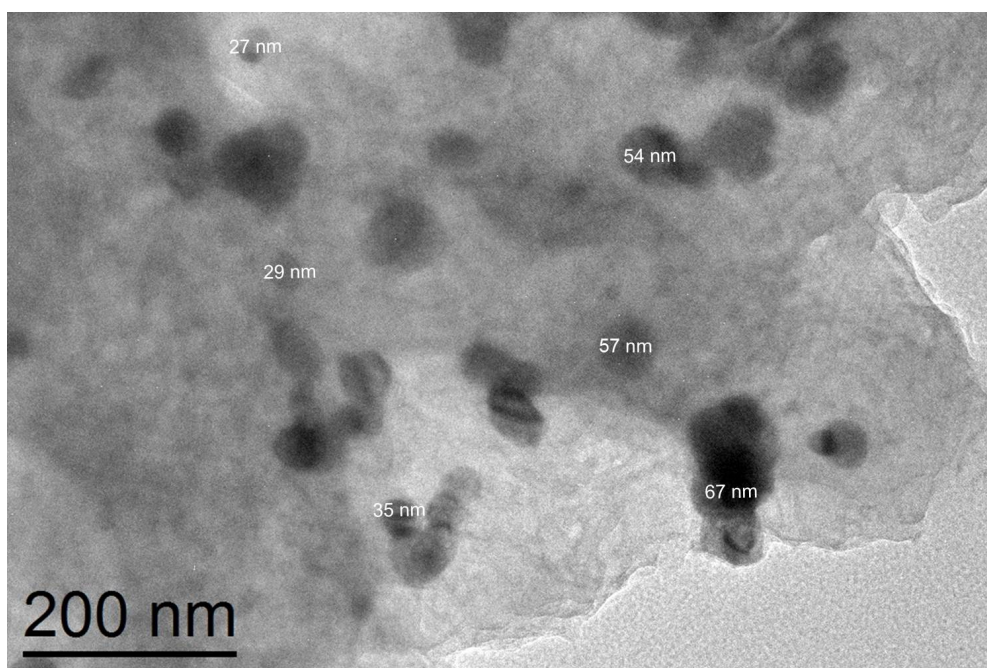

**Figure S7.** TEM image of the Ni/C-300 after 10 cycles.
